# Supplementary material for: Geographic Variations in Human Mobility Patterns during the First Six Months of the COVID-19 Pandemic in California
Source: MDPI journal article supplement (doi:10.3390/app13042440), 2023-02-14
Supplement: s1 [file s1]

# Supplementary Materials

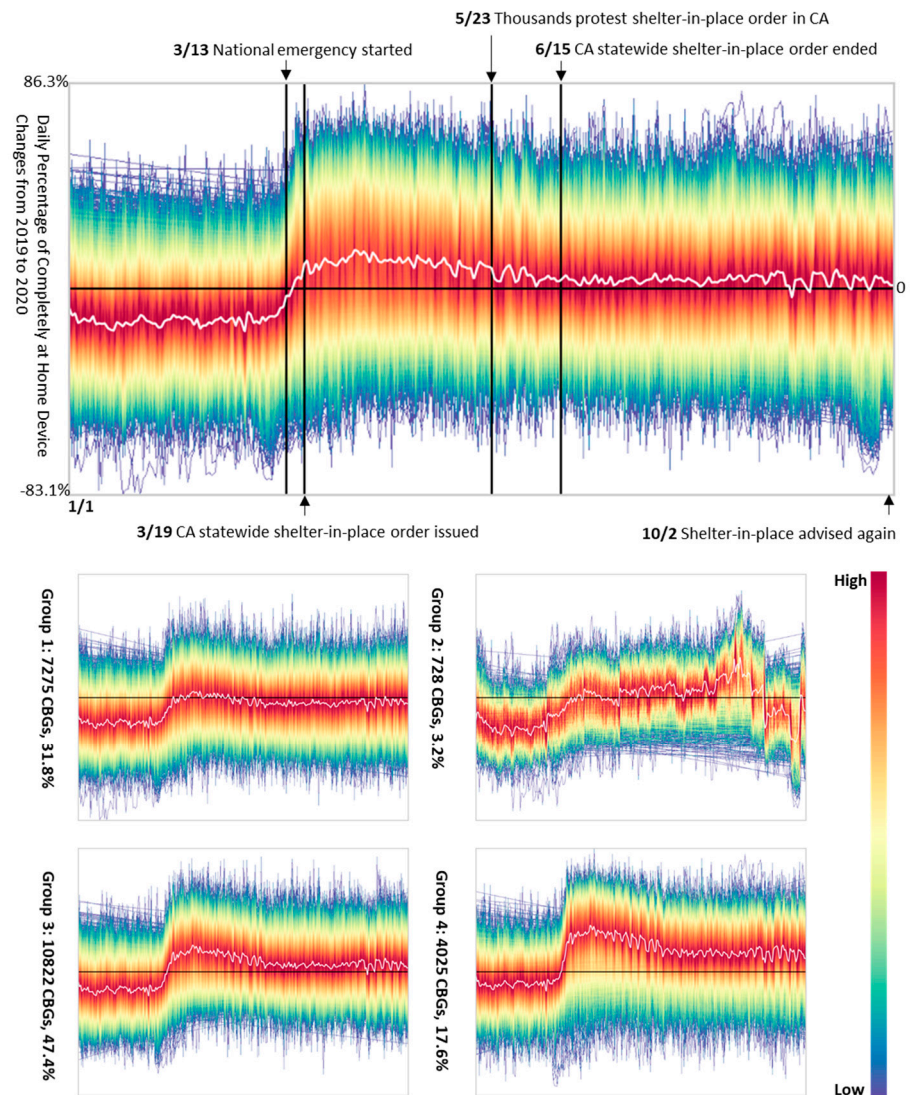

**Figure S1.** Heat map of CA statewide daily percentage of completely at home device changes and the 4 DTW-SOM groups.

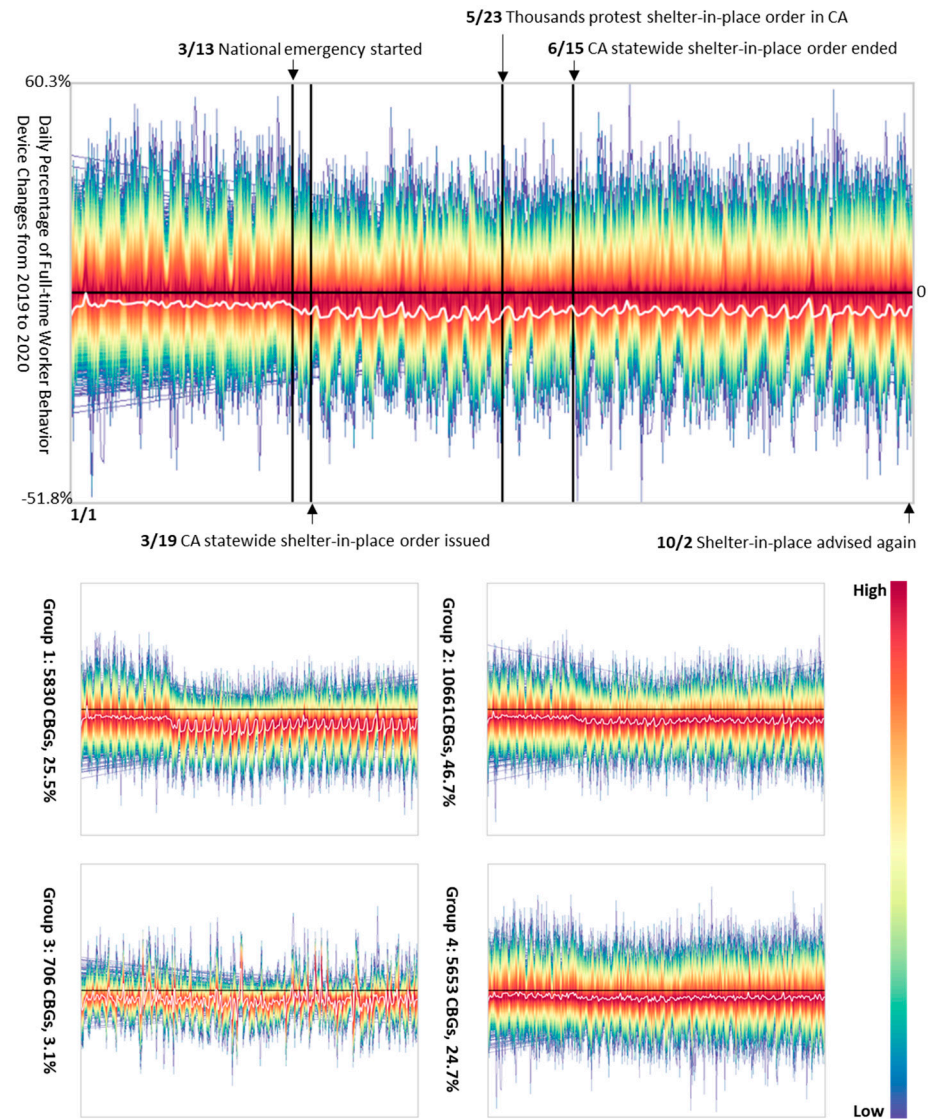

**Figure S2.** Heat map of CA statewide daily percentage of full-time worker behavior device changes and the 4 DTW-SOM groups.

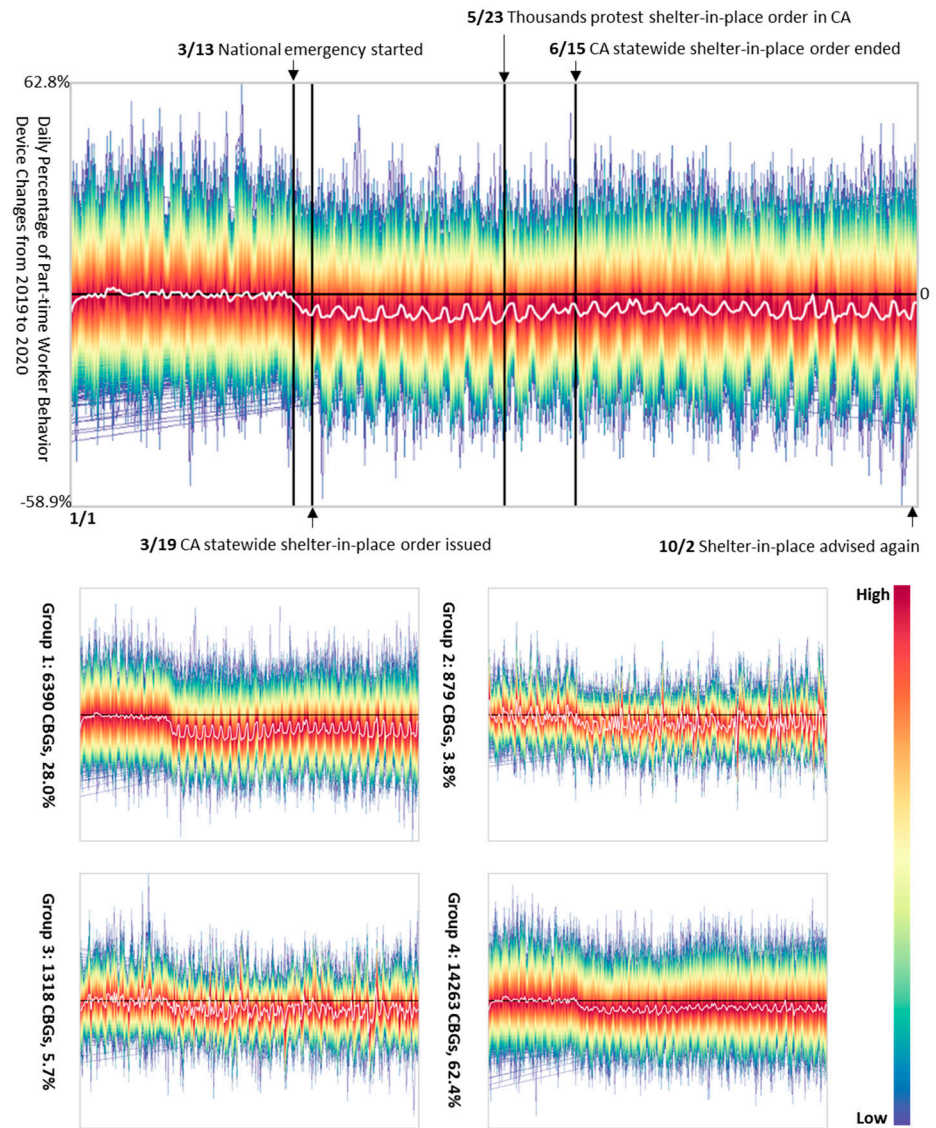

**Figure S3.** Heat map of CA statewide daily percentage of part-time worker behavior device changes and the 4 DTW-SOM groups.

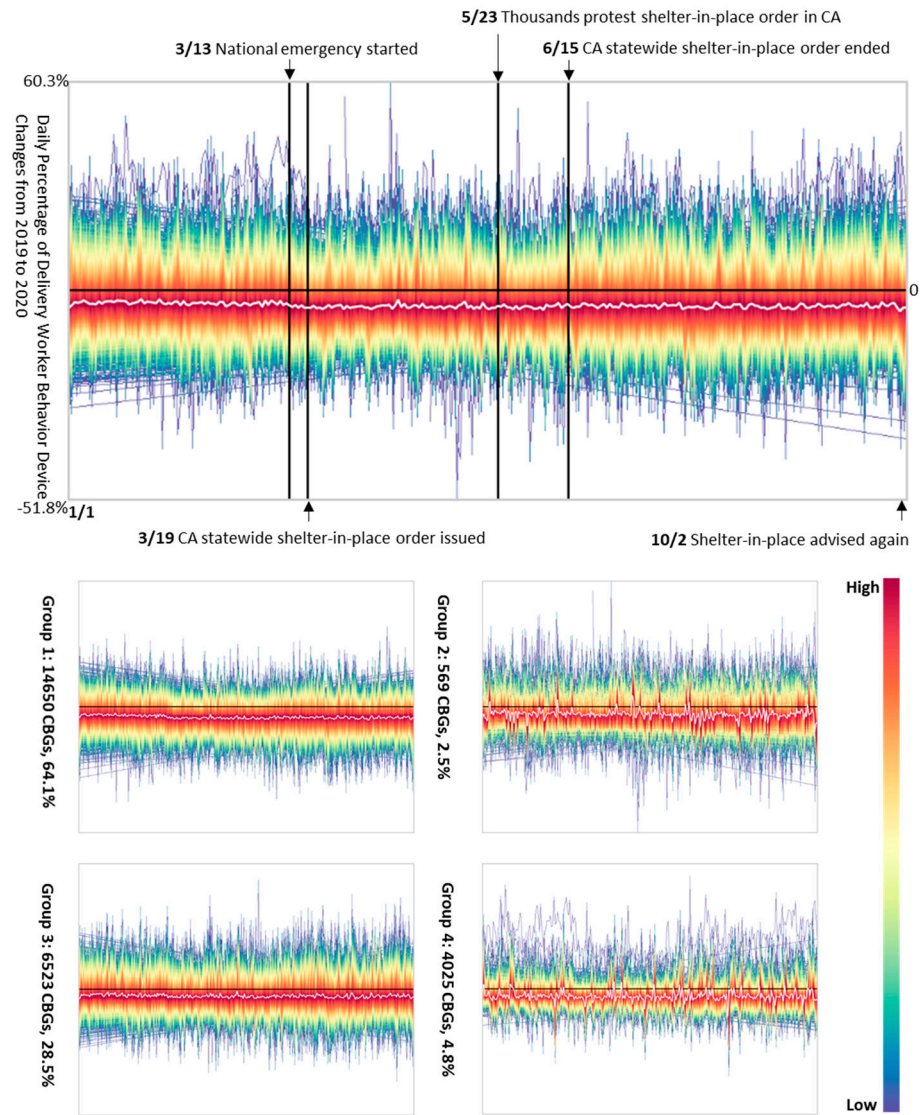

**Figure S4.** Heat map of CA statewide daily percentage of delivery worker behavior device changes and the 4 DTW-SOM groups.



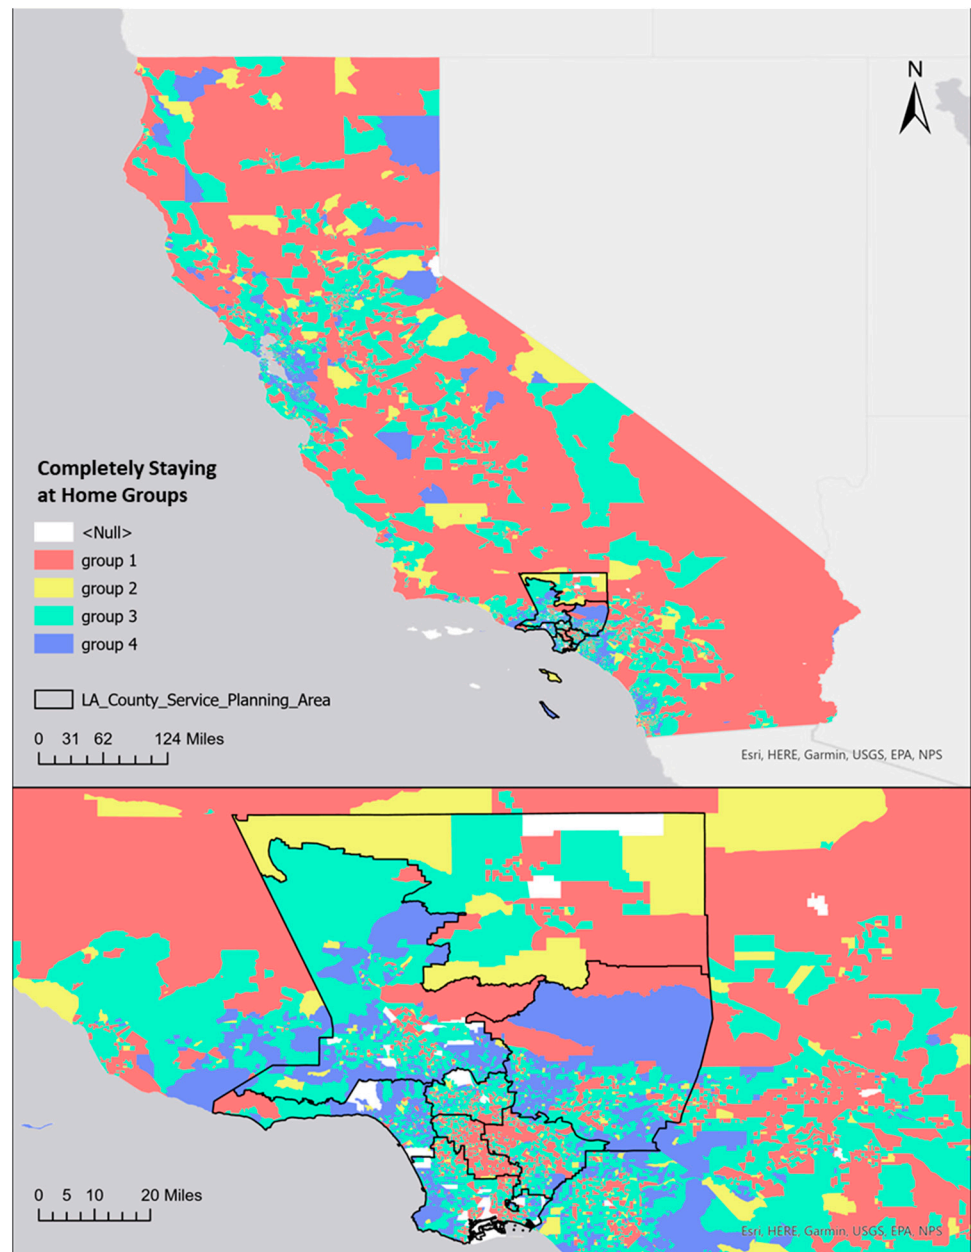

**Figure S5.** Geographical locations of the CBGs in each completely staying at home groups of the whole CA state with inset view of the SPAs of LA county.

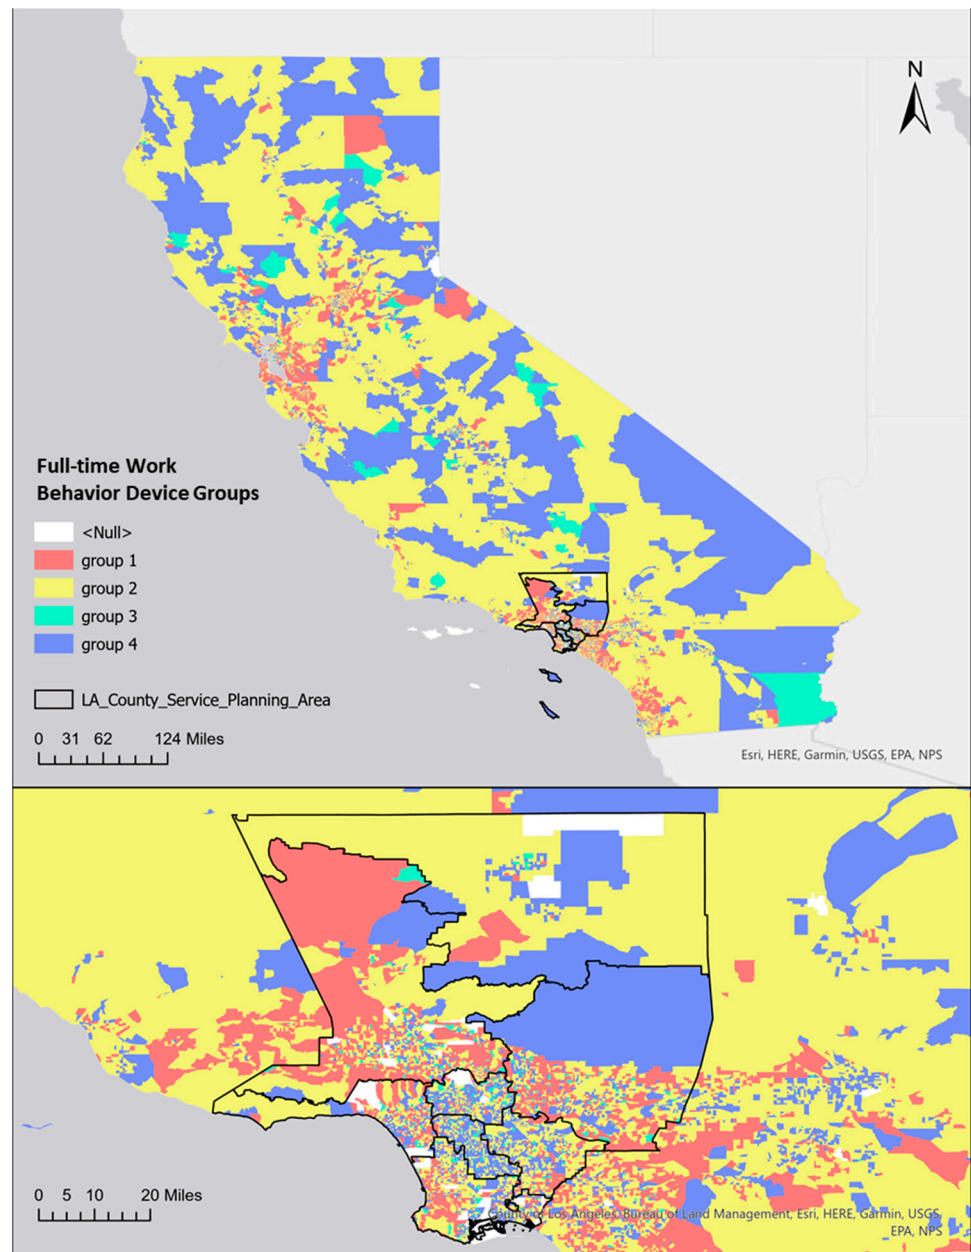

**Figure S6.** Geographical locations of the CBGs in each full-time work behavior device groups of the whole CA state with inset view of the SPAs of LA county.

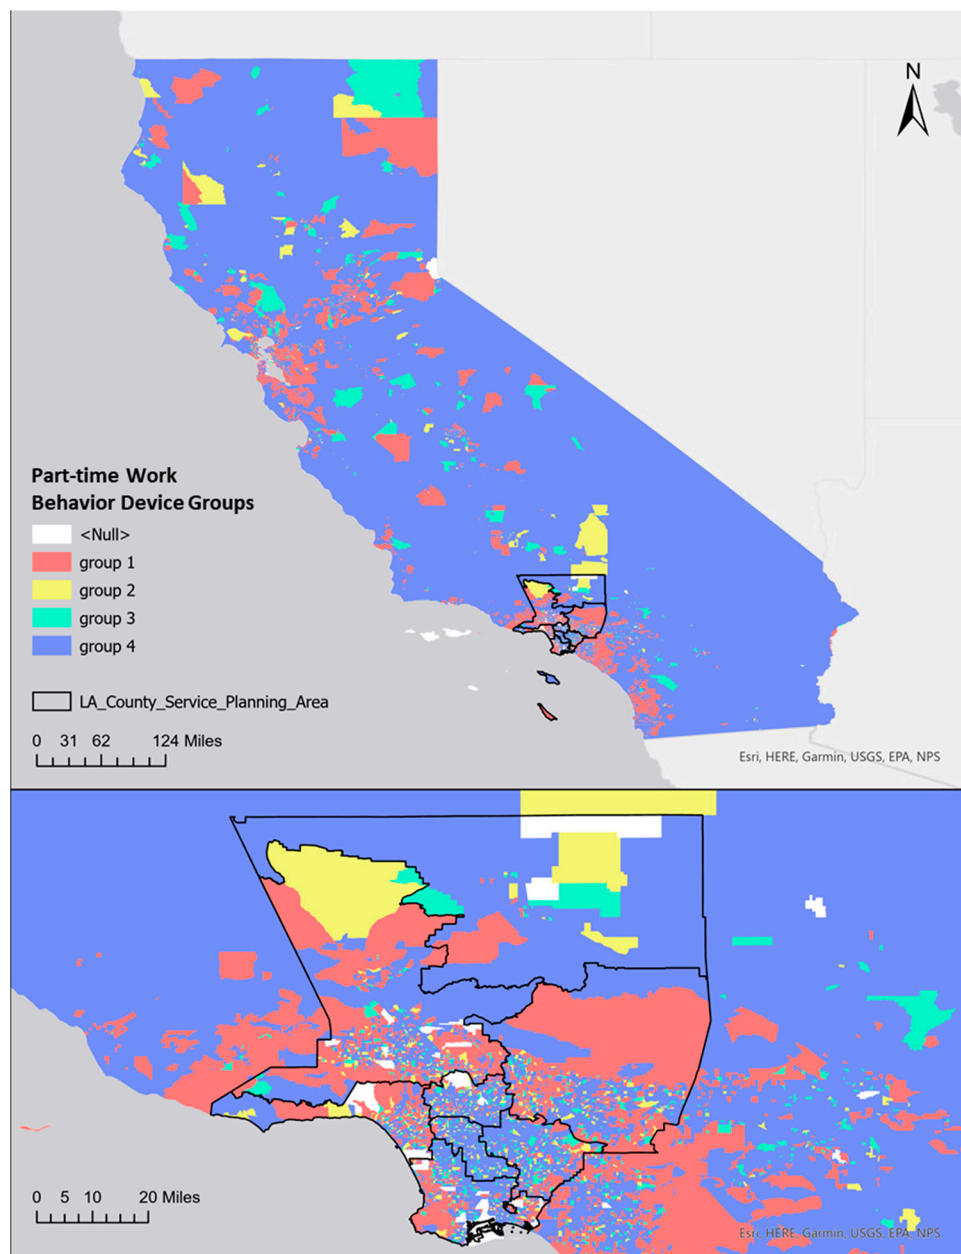

**Figure S7.** Geographical locations of the CBGs in each part-time work behavior device groups of the whole CA state with inset view of the SPAs of LA county.

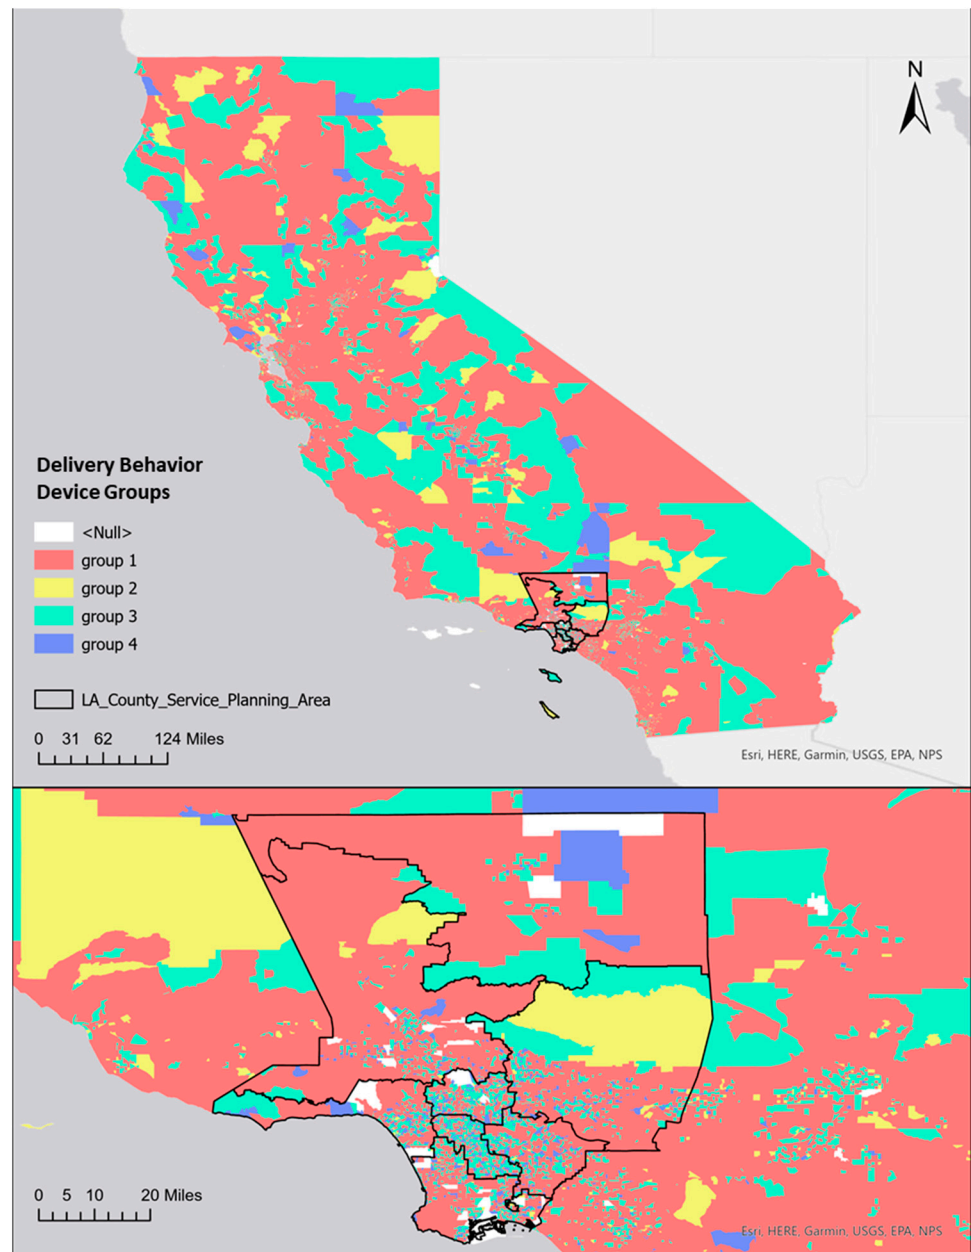

**Figure S8.** Geographical locations of the CBGs in each delivery work behavior device groups of the whole CA state with inset view of the SPAs of LA county.
